# Supplementary material for: Elucidation of protein–ligand interactions by multiple trajectory analysis methods
Source: Royal Society of Chemistry journal article supplement (doi:10.1039/d3cp03492e), 2024-01-01
Supplement: d3cp03492e2.pdf [file d3cp03492e2.pdf]

## Supplementary Information

for

“Elucidation of Protein-Ligand Interactions by Multiple  
Trajectory Analysis Methods”

Nian Wu<sup>1, #, \*</sup>, Ruotian Zhang<sup>1, #</sup>, Xingang Peng<sup>1</sup>, Lincan Fang<sup>2</sup>, Kai Chen<sup>3</sup>, Joakim S.  
Jestilä<sup>2</sup>

**1 Institute for Interdisciplinary Information Sciences, Tsinghua University,  
Beijing, China.**

**2 Applied Physics, Aalto University, Espoo, Finland.**

**3 Institute of Catalysis, Zhejiang University, Hangzhou, China.**

**# These authors contributed equally.**

**\* All correspondence should be addressed to [wunianwhu@gmail.com](mailto:wunianwhu@gmail.com).**

Table S1: Information of the selected 100 ligand-protein complexes

|    | <b>pdbid</b> | <b>uniprot</b> | <b>measure</b> | <b>affinity</b> | <b>unit</b> | <b>affinity(-logKd)</b> |
|----|--------------|----------------|----------------|-----------------|-------------|-------------------------|
| 0  | 4xtx         | I6YFP0         | Kd             | 0.027           | nM          | 10.57                   |
| 1  | 4rfm         | Q08881         | Ki             | 0.09            | nM          | 10.05                   |
| 2  | 4xtz         | I6YFP0         | Kd             | 0.153           | nM          | 9.82                    |
| 3  | 3lxk         | P52333         | Kd             | 0.16            | nM          | 9.8                     |
| 4  | 4cd0         | Q9UM73         | Ki             | 0.2             | nM          | 9.7                     |
| 5  | 5anu         | P36639         | Kd             | 0.4             | nM          | 9.4                     |
| 6  | 4crf         | P03951         | Ki             | 0.5             | nM          | 9.3                     |
| 7  | 3vhd         | P07900         | Kd             | 0.52            | nM          | 9.28                    |
| 8  | 2xab         | P07900         | Kd             | 0.54            | nM          | 9.27                    |
| 9  | 4clj         | Q9UM73         | Ki             | 0.7             | nM          | 9.15                    |
| 10 | 3d91         | P00797         | Ki             | 0.7             | nM          | 9.15                    |
| 11 | 2xjx         | P07900         | Kd             | 0.71            | nM          | 9.15                    |
| 12 | 3gnw         | O92972         | Kd             | 0.79            | nM          | 9.1                     |
| 13 | 5lwm         | P52333         | Kd             | 1.34            | nM          | 8.87                    |
| 14 | 5cas         | P00533         | Ki             | 1.4             | nM          | 8.85                    |
| 15 | 5uoo         | O60885         | Ki             | 1.4             | nM          | 8.85                    |
| 16 | 5e2p         | P03951         | Ki             | 1.6             | nM          | 8.8                     |
| 17 | 4x6o         | P03951         | Ki             | 1.9             | nM          | 8.72                    |
| 18 | 5mpk         | Q92793         | Kd             | 3               | nM          | 8.52                    |
| 19 | 4y8x         | P03951         | Ki             | 3.7             | nM          | 8.43                    |
| 20 | 3zxz         | P08581         | Ki             | 4               | nM          | 8.4                     |
| 21 | 5fck         | P00746         | Kd             | 6               | nM          | 8.22                    |

|    |      |        |    |       |    |      |
|----|------|--------|----|-------|----|------|
| 22 | 4pop | A2RI47 | Kd | 7.44  | nM | 8.13 |
| 23 | 3gvu | P42684 | Kd | 10    | nM | 8    |
| 24 | 1fkg | P62942 | Ki | 10    | nM | 8    |
| 25 | 3r4p | P07900 | Ki | 11    | nM | 7.96 |
| 26 | 5i1q | P21675 | Kd | 12    | nM | 7.92 |
| 27 | 4w9p | Q13451 | Ki | 16    | nM | 7.8  |
| 28 | 5ueu | O60885 | Ki | 16.7  | nM | 7.78 |
| 29 | 4w9o | Q13451 | Ki | 17    | nM | 7.77 |
| 30 | 3tzm | P36897 | Ki | 17    | nM | 7.77 |
| 31 | 1lee | P46925 | Ki | 18    | nM | 7.74 |
| 32 | 4auj | A2IC68 | Kd | 18.3  | nM | 7.74 |
| 33 | 3rlr | P07900 | Ki | 30    | nM | 7.52 |
| 34 | 5nlk | Q92793 | Kd | 35    | nM | 7.46 |
| 35 | 1b5j | P06202 | Kd | 37    | nM | 7.43 |
| 36 | 4kn0 | P14207 | Kd | 40    | nM | 7.4  |
| 37 | 2j7e | Q08638 | Kd | 48    | nM | 7.32 |
| 38 | 6ckr | O60885 | Kd | 50    | nM | 7.3  |
| 39 | 4xit | P07900 | Ki | 54    | nM | 7.27 |
| 40 | 1q7a | P59071 | Kd | 64    | nM | 7.19 |
| 41 | 2i6b | Q5VXR3 | Kd | 68    | nM | 7.17 |
| 42 | 3rlp | P07900 | Kd | 84    | nM | 7.08 |
| 43 | 4xiq | P07900 | Ki | 86    | nM | 7.07 |
| 44 | 4fcq | P07900 | Kd | 101   | nM | 7    |
| 45 | 4att | A2IC68 | Kd | 104.6 | nM | 6.98 |

---

|    |      |        |    |     |    |      |
|----|------|--------|----|-----|----|------|
| 46 | 3pn1 | P43813 | Ki | 110 | nM | 6.96 |
| 47 | 5ie1 | P56817 | Kd | 140 | nM | 6.85 |
| 48 | 1fhd | P07986 | Ki | 150 | nM | 6.82 |
| 49 | 4nue | O60885 | Ki | 150 | nM | 6.82 |
| 50 | 6fo5 | O60885 | Kd | 190 | nM | 6.72 |
| 51 | 2fqw | P29724 | Kd | 210 | nM | 6.68 |
| 52 | 5op5 | O14757 | Ki | 216 | nM | 6.67 |
| 53 | 1pxp | P24941 | Ki | 220 | nM | 6.66 |
| 54 | 4xip | P07900 | Ki | 235 | nM | 6.63 |
| 55 | 4btk | Q5TCY1 | Kd | 240 | nM | 6.62 |
| 56 | 3sr4 | Q8TEK3 | Ki | 290 | nM | 6.54 |
| 57 | 2xjj | P07900 | Kd | 310 | nM | 6.51 |
| 58 | 5uc4 | P08238 | Kd | 350 | nM | 6.46 |
| 59 | 1fh9 | P07986 | Ki | 370 | nM | 6.43 |
| 60 | 2w9h | P0A017 | Kd | 430 | nM | 6.37 |
| 61 | 5ant | P36639 | Kd | 440 | nM | 6.36 |
| 62 | 3k5v | P00520 | Kd | 500 | nM | 6.3  |
| 63 | 5lz7 | Q13093 | Kd | 530 | nM | 6.28 |
| 64 | 4bqg | Q2VPJ6 | Kd | 600 | nM | 6.22 |
| 65 | 1sqt | P00749 | Ki | 630 | nM | 6.2  |
| 66 | 5kax | Q8KFZ1 | Kd | 780 | nM | 6.11 |
| 67 | 5fso | P36639 | Kd | 810 | nM | 6.09 |
| 68 | 5h9r | P17931 | Kd | 840 | nM | 6.08 |
| 69 | 5d3l | O60885 | Kd | 880 | nM | 6.06 |

---

|    |      |        |    |        |    |      |
|----|------|--------|----|--------|----|------|
| 70 | 4nuc | O60885 | Ki | 910    | nM | 6.04 |
| 71 | 4km0 | P0A546 | Kd | 910    | nM | 6.04 |
| 72 | 2xht | P07900 | Kd | 1100   | nM | 5.96 |
| 73 | 5eng | Q92793 | Kd | 1400   | nM | 5.85 |
| 74 | 4km2 | P0A546 | Kd | 1430   | nM | 5.84 |
| 75 | 5tb6 | Q92793 | Kd | 1530   | nM | 5.82 |
| 76 | 6ey8 | P07900 | Kd | 1550   | nM | 5.81 |
| 77 | 6eog | P17931 | Kd | 1600   | nM | 5.8  |
| 78 | 5fsn | P36639 | Kd | 1700   | nM | 5.77 |
| 79 | 5mwh | P55201 | Kd | 1800   | nM | 5.74 |
| 80 | 5n18 | Q5A4W8 | Kd | 2100   | nM | 5.68 |
| 81 | 2ojg | P28482 | Ki | 2300   | nM | 5.64 |
| 82 | 2uy5 | P29029 | Ki | 3200   | nM | 5.49 |
| 83 | 4jfm | Q13451 | Kd | 3300   | nM | 5.48 |
| 84 | 1b46 | P06202 | Kd | 5200   | nM | 5.28 |
| 85 | 5o5a | P55201 | Kd | 17000  | nM | 4.77 |
| 86 | 5lne | Q1RBS0 | Kd | 17430  | nM | 4.76 |
| 87 | 4ih6 | P26663 | Kd | 18000  | nM | 4.74 |
| 88 | 4j7d | P56273 | Kd | 20000  | nM | 4.7  |
| 89 | 2uy4 | P29029 | Ki | 21000  | nM | 4.68 |
| 90 | 4p58 | P22734 | Ki | 25000  | nM | 4.6  |
| 91 | 3vhk | P35968 | Ki | 25000  | nM | 4.6  |
| 92 | 2whp | P21836 | Kd | 100000 | nM | 4    |
| 93 | 5fou | O74036 | Kd | 113000 | nM | 3.95 |

---

|    |      |        |    |         |    |      |
|----|------|--------|----|---------|----|------|
| 94 | 4yk0 | Q92793 | Kd | 181000  | nM | 3.74 |
| 95 | 6gjr | P62937 | Kd | 184000  | nM | 3.74 |
| 96 | 3isj | P0A5R0 | Kd | 210000  | nM | 3.68 |
| 97 | 4b3b | O74036 | Kd | 250000  | nM | 3.6  |
| 98 | 1pzp | P62593 | Ki | 490000  | nM | 3.31 |
| 99 | 5fov | O74036 | Kd | 1590000 | nM | 2.8  |

---

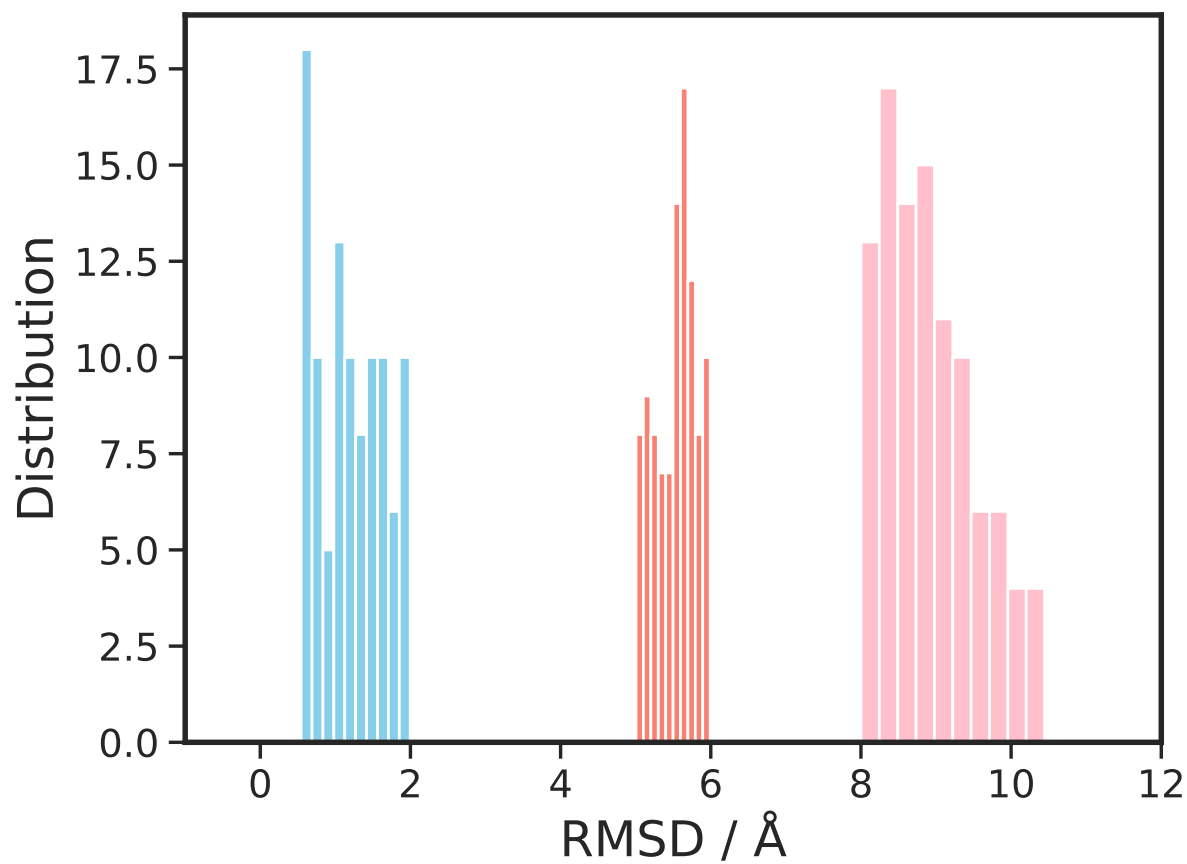

**Figure S1:** The distribution of RMSD for selected conformations close to 2 Å, 5 Å and 10 Å reference to the corresponding native structures.

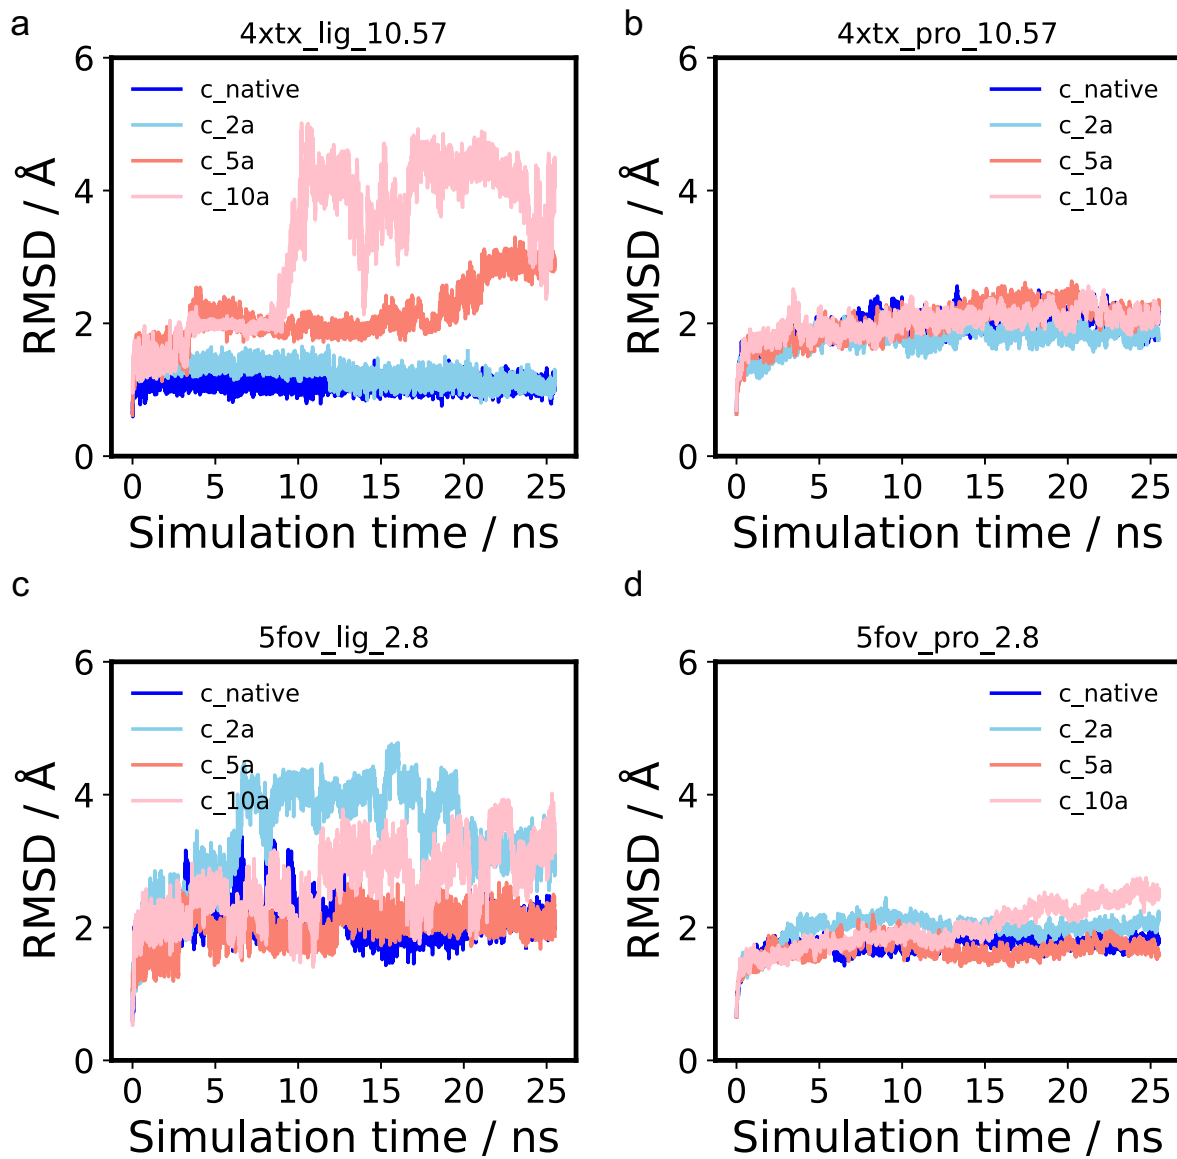

**Figure S2:** RMSD profile of ligand and protein of pdbid 4xtx complex and pdbid 5fov complex.



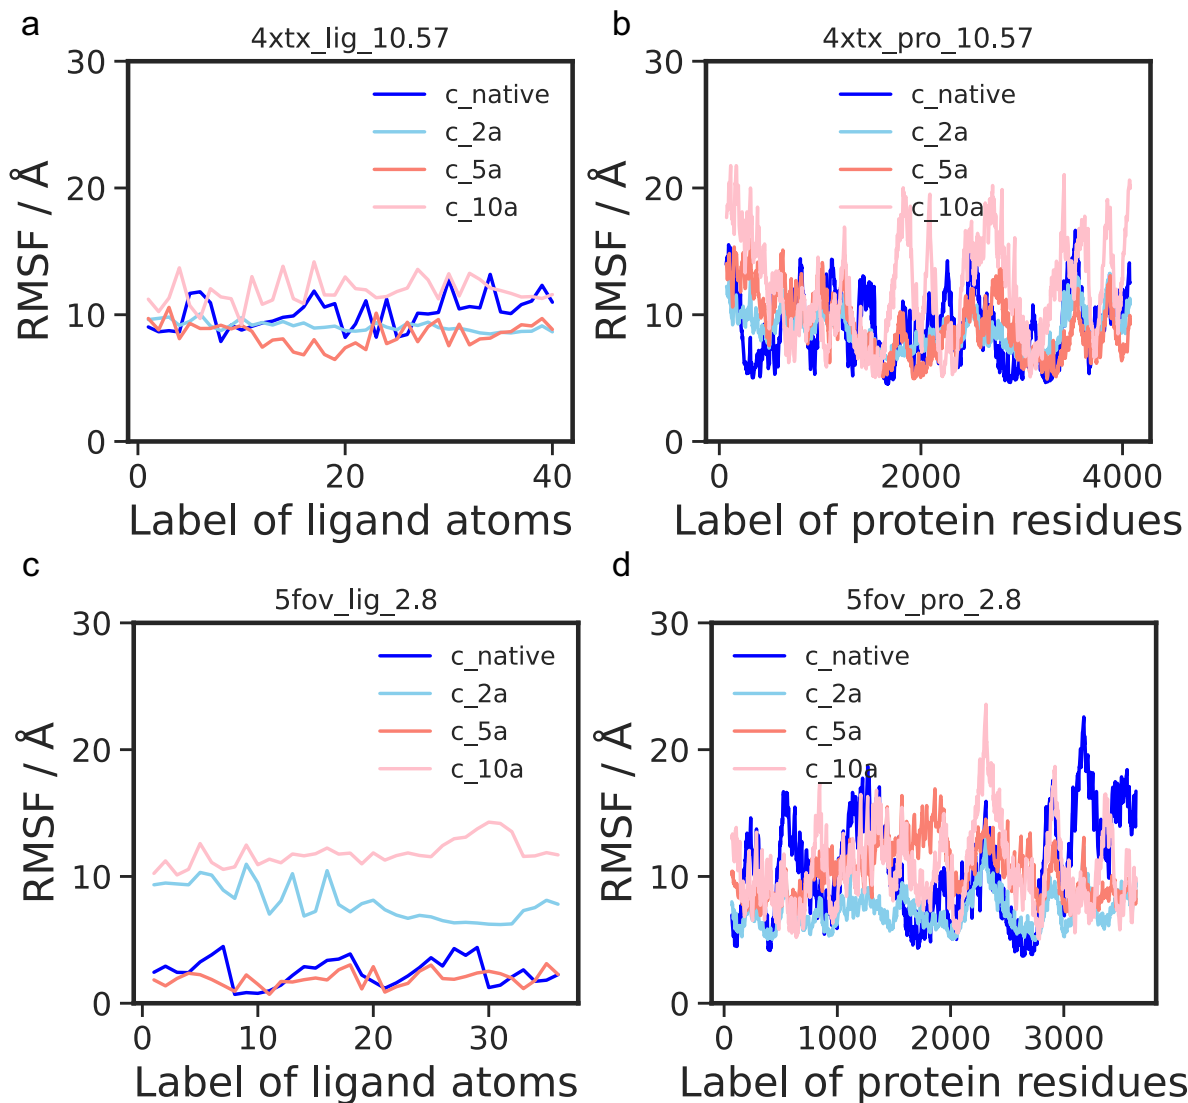

**Figure S3:** RMSF profile of ligand and protein of pdbid 4xtx complex and pdbid 5fov complex.

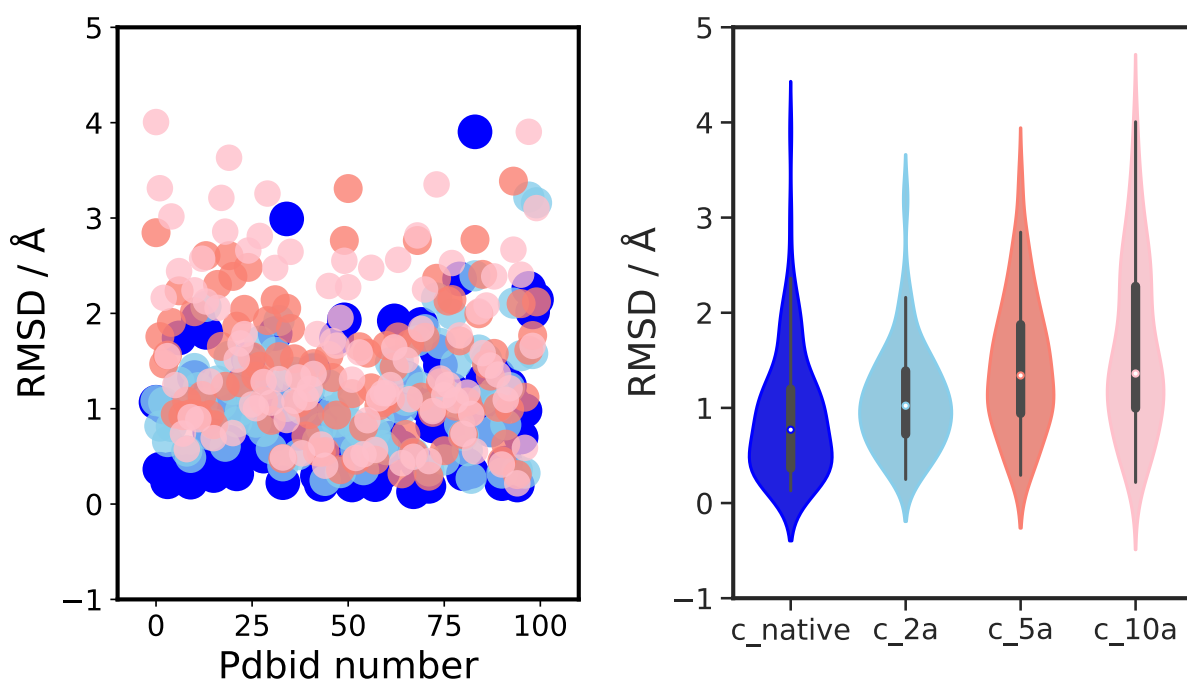

**Figure S4:** The distribution and boxplot of averaged RMSD of last 5 ns for selected 100 complexes.

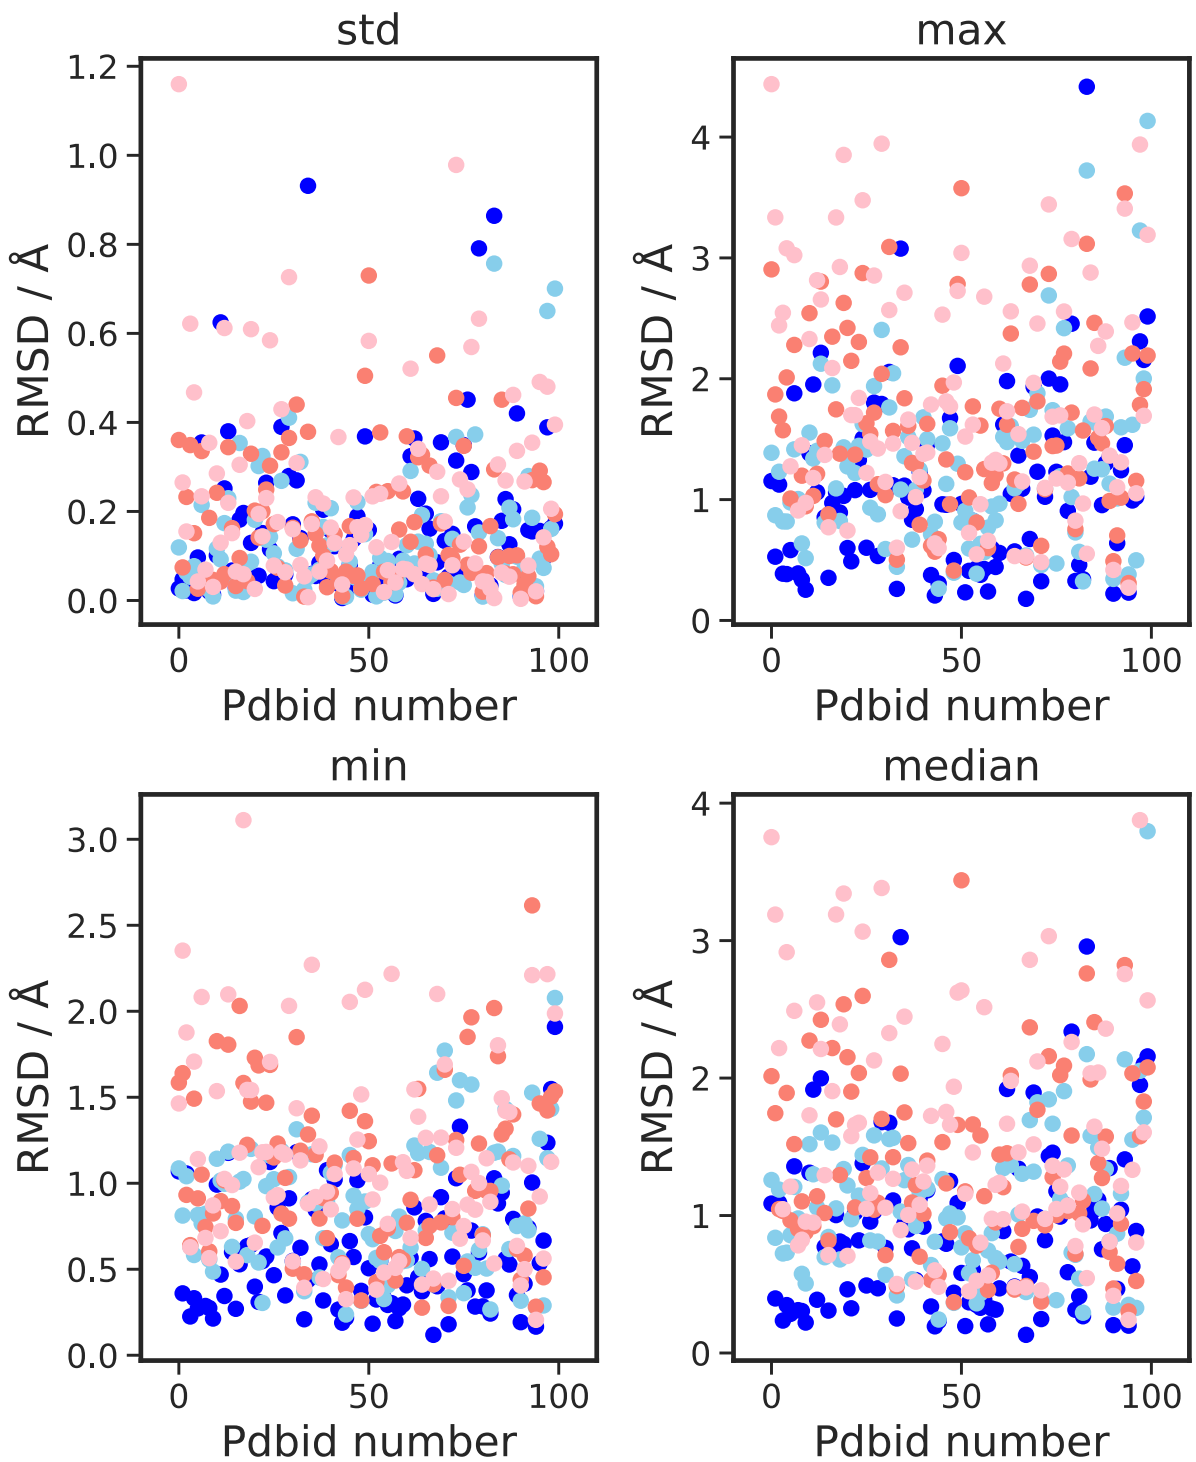

**Figure S5:** The distribution of the stand deviation, max, min, median values of averaged RMSD of last 5 ns for selected 100 complexes.

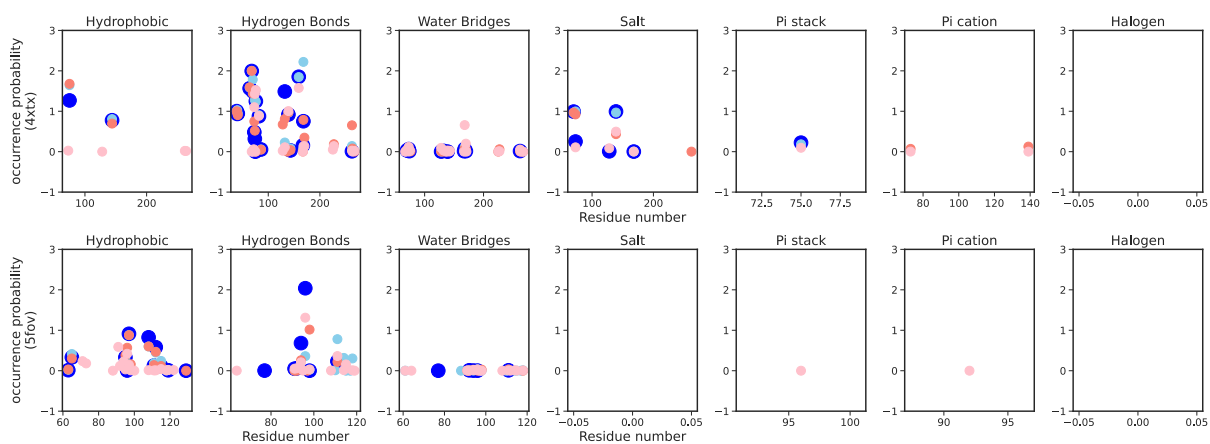

**Figure S6:** The occurrence frequency of each interaction pairs among seven interaction patterns detected by PLIP for the complex of pdbid 4xtx complex and pdbid 5fov complex during MD simulations of 25 ns.

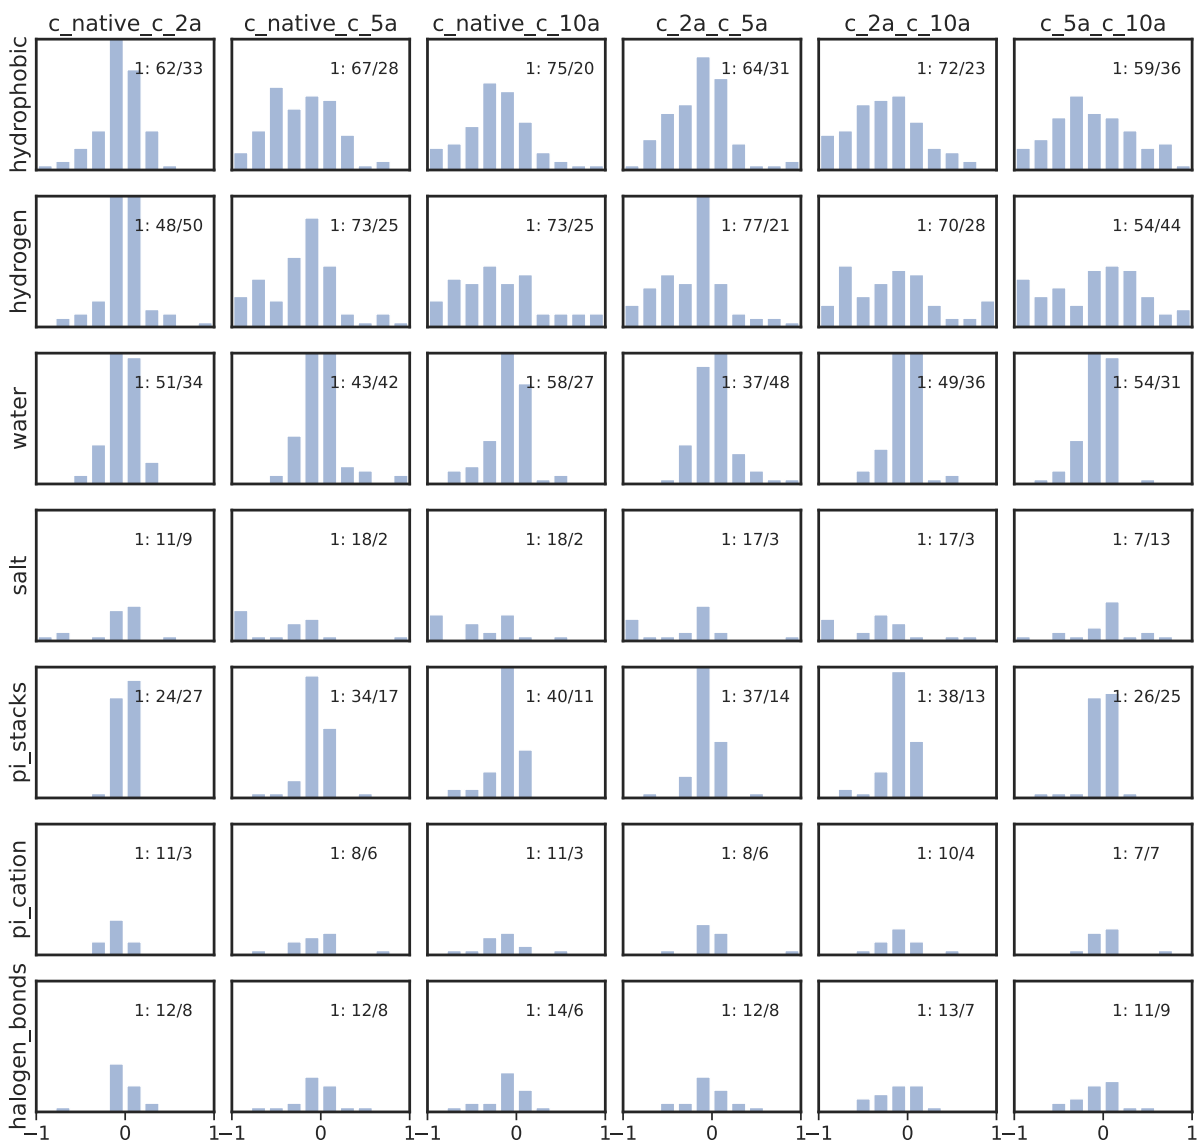

**Figure S7:** Difference of the highest occurrence probability for pairwise comparisons in four poses. From top to bottom, hydrophobic interaction, hydrogen bonds, water bridges, salt bridges, pi\_stacking, pi\_cation and halogen bonds.

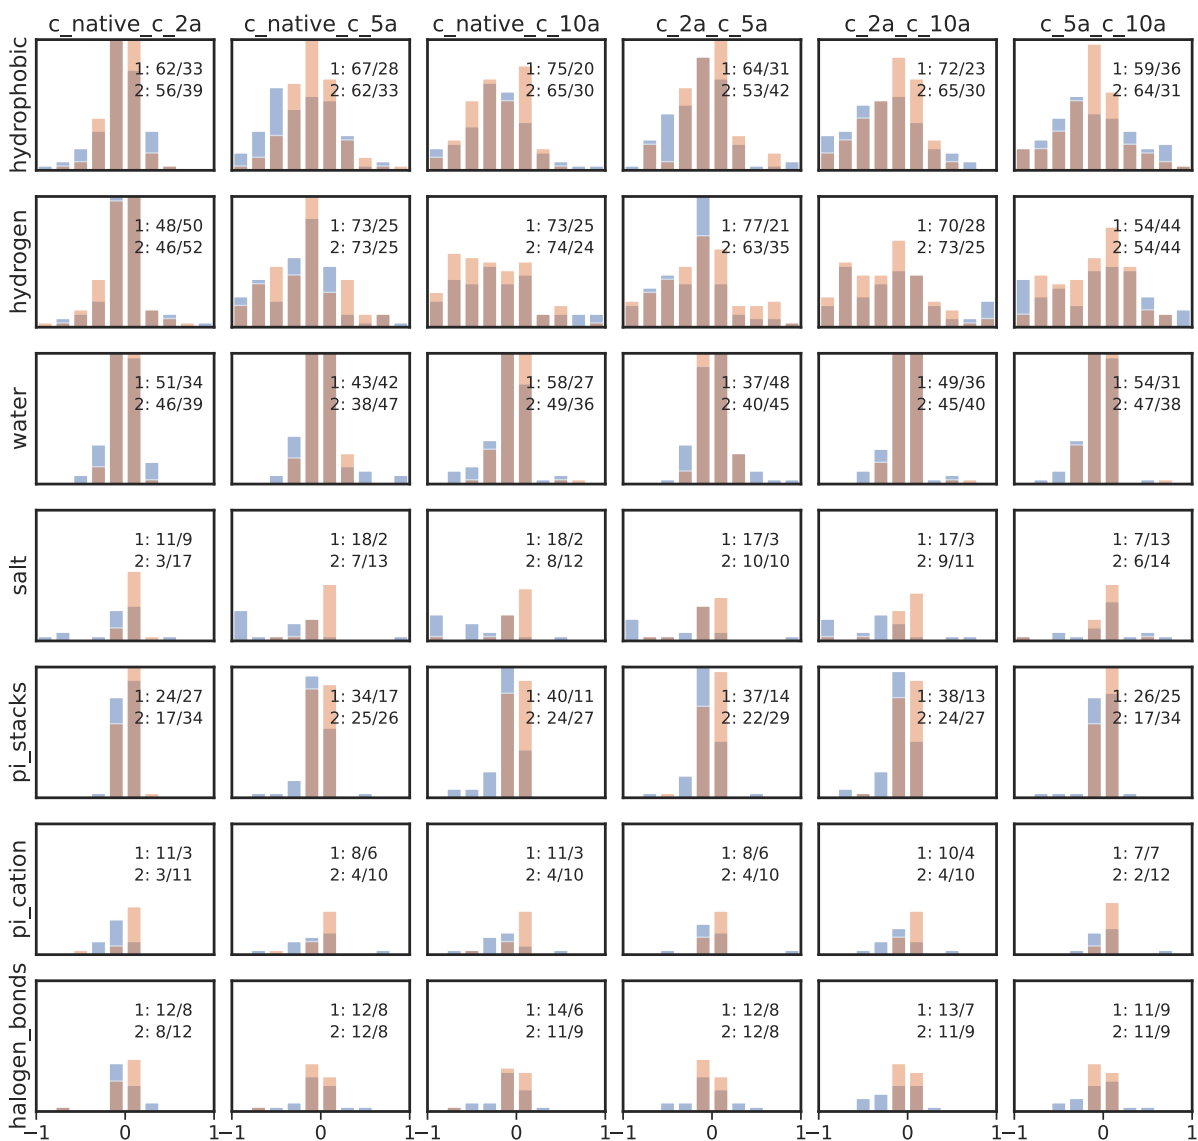

**Figure S8:** Difference of the top two highest occurrence probability for pairwise comparisons in four poses. From top to bottom, hydrophobic interaction, hydrogen bonds, water bridges, salt bridges, pi\_stacking, pi\_cation and halogen bonds.

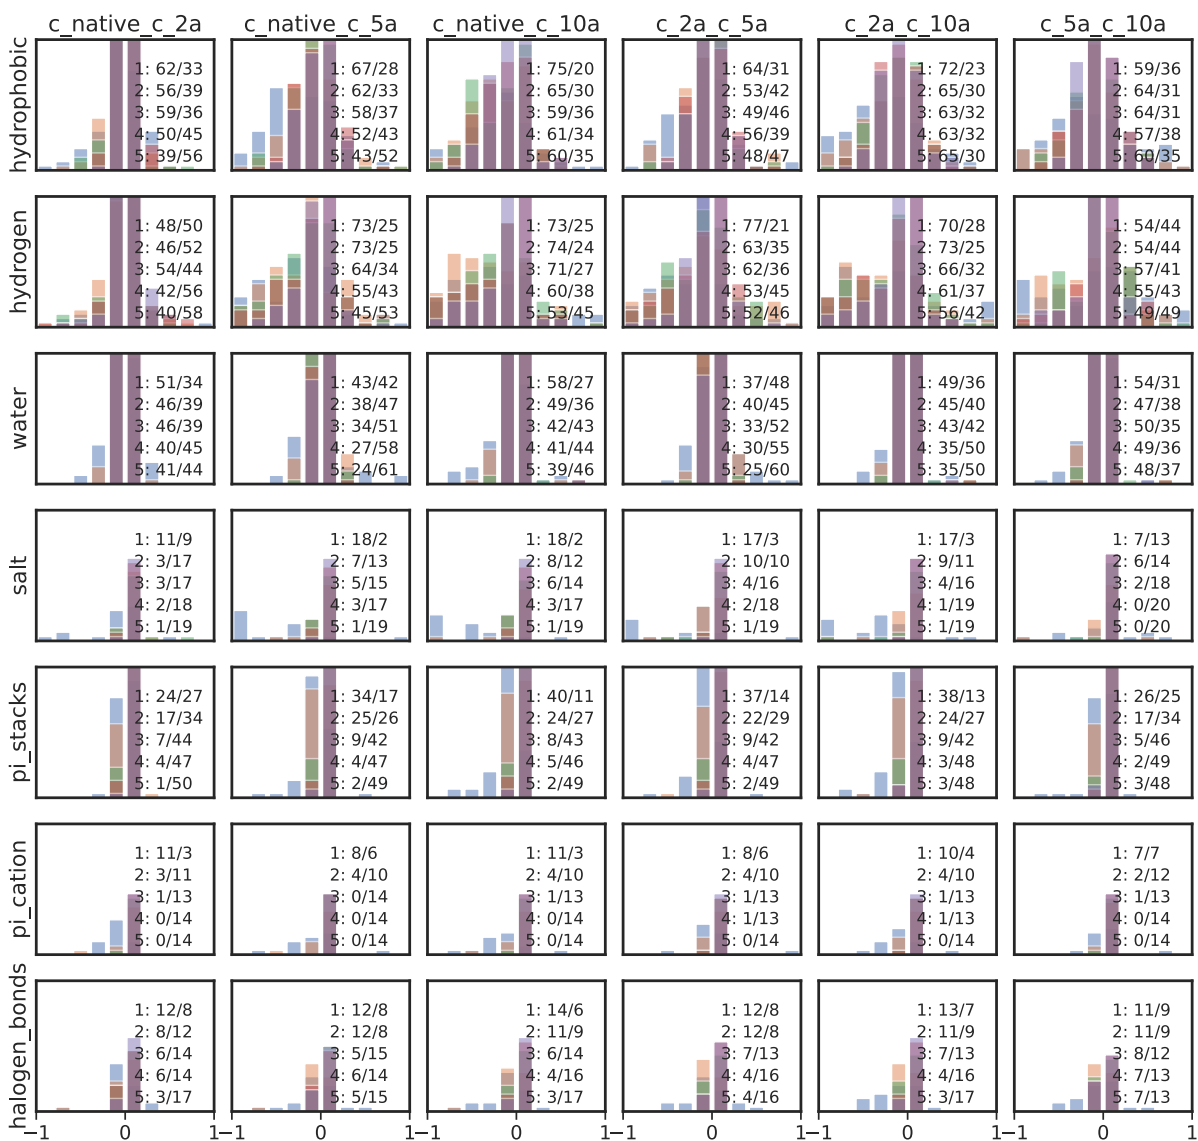

**Figure S9:** Difference of the top five highest occurrence probability for pairwise comparisons in four poses. From top to bottom, hydrophobic interaction, hydrogen bonds, water bridges, salt bridges, pi\_stacking, pi\_cation and halogen bonds.
